# Supplementary material for: A novel biocompatible polymeric blend for applications requiring high toughness and tailored degradation rate
Source: Royal Society of Chemistry journal article supplement (doi:10.1039/d0tb02971h), 2021-01-01
Supplement: d0tb02971h1.pdf [file d0tb02971h1.pdf]

## Supporting Information

# A novel biocompatible polymeric blend for applications requiring high toughness and tailored degradation rate

*Behzad Shiroud Heidari*<sup>a,b,c,\*</sup>, *Peilin Chen*<sup>d</sup>, *Ruan Rui*<sup>d</sup>, *Seyed Mohammad Davachi*<sup>e</sup>, *Hani Al-Salami*<sup>f</sup>, *Elena De Juan Pardo*<sup>a,b,g</sup>, *Minghao Zheng*<sup>d,h</sup>, *Barry Doyle*<sup>a,b,c,i</sup>

a. Harry Perkins Institute of Medical Research, QEII Medical Centre, Nedlands and the UWA Centre for Medical Research, The University of Western Australia, Perth, Australia.

b. School of Engineering, The University of Western Australia, Perth, Australia.

c. Australian Research Council Centre for Personalised Therapeutics Technologies, Australia.

d. Centre for Orthopaedic Research, Faculty of Health and Medical Sciences, The University of Western Australia, Perth, Australia.

e. Department of Food Science, College of Agriculture and Life Sciences, Cornell University, Ithaca, NY, USA

f. Biotechnology and Drug Development Research Laboratory, School of Pharmacy and Biomedical Sciences, Curtin Health Innovation Research Institute, Curtin University, Perth, Western Australia. Australia.

g. Science and Engineering Faculty, Queensland University of Technology, Brisbane, Queensland, Australia.

h. Perron Institute for Neurological and Translational Science, Nedlands, Western Australia, Australia.

i. British Heart Foundation Centre for Cardiovascular Science, The University of Edinburgh, Edinburgh, UK.

\*Corresponding author: [behzad.shiroudheidari@research.uwa.edu.au](mailto:behzad.shiroudheidari@research.uwa.edu.au)

To evaluate the chemical composition of PDO/LCL blends, the FTIR spectra was recorded (**Figure S1**). The broad band at 3200–3650  $\text{cm}^{-1}$  for PDO, PDO7LCL3, and PDO5LCL5 is due to the associating vibration hydroxyl (*-O-H*) group. The sequential bands at 2800-3000  $\text{cm}^{-1}$  are ascribed to *C-H* stretching of  $-\text{CH}_2$  groups in all samples <sup>1,2</sup>. The sharp peaks located at 1732  $\text{cm}^{-1}$  are assigned to the carbonyl (*C=O*) stretching vibration of PDO and LCL (at 1755  $\text{cm}^{-1}$ ) at side chains. The peaks at 1050, 1123, and 1202  $\text{cm}^{-1}$  belong to *C-O* stretching vibration of PDO and the sequential peaks at 1456, 1431, and 1369  $\text{cm}^{-1}$  represent the *-CH* bending vibration of PDO <sup>1,3</sup>. Small shifts in LCL peaks can be seen (**Figure S1B**); for example, the *C-O* stretching vibration peaks appear at 1042, 1084, 1129, and 1181  $\text{cm}^{-1}$  and the sequential peaks of *-CH* bending vibrations are located at 1456, 1383, and 1357  $\text{cm}^{-1}$  <sup>3,4</sup>. The intensity and wave number of functional groups are changed by blending PDO and LCL (**Figure S1B**). For instance, the spectra of PDO7LCL3 and PDO3LCL7 are similar to the spectra of PDO and LCL, respectively, indicating that the spectrum of each blend strongly depends on the ratio of PDO to LCL. However, no new peaks were found in the spectra of blend samples, indicating that no chemical reaction or functionalization occurred during material preparation process.

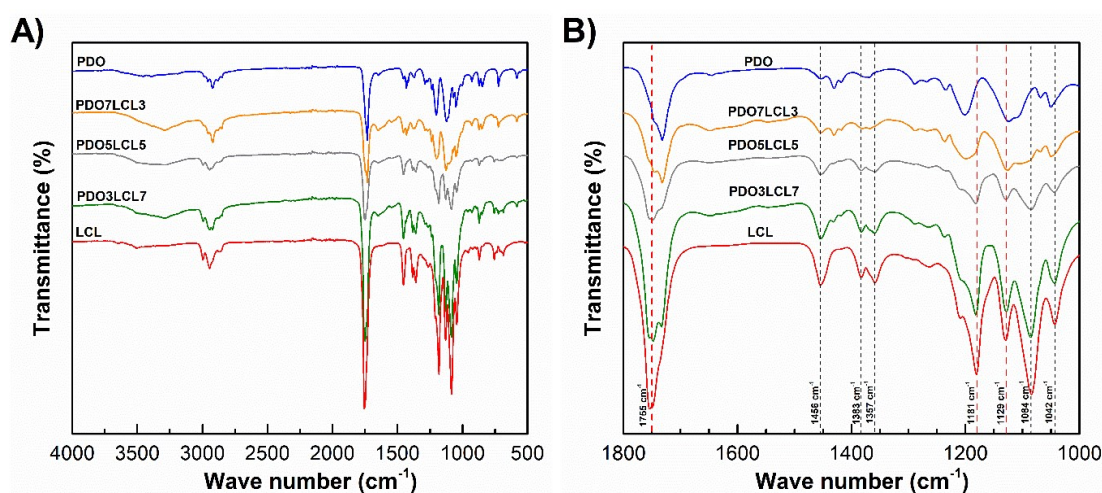

**Figure S1.** FTIR spectra of LCL/PDO binary blends in (A) 500-4000  $\text{cm}^{-1}$  and (B) 1000-1800  $\text{cm}^{-1}$  wave numbers. The red dashed lines indicate the small shift in the peaks associated with the polymer ratio.

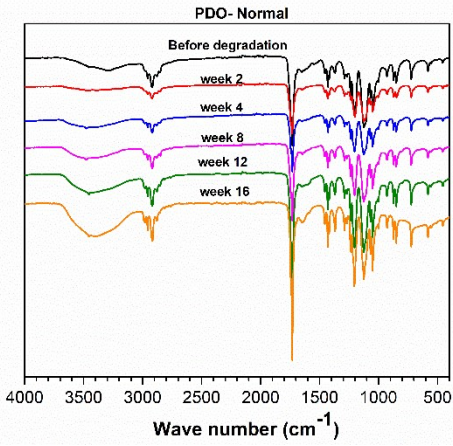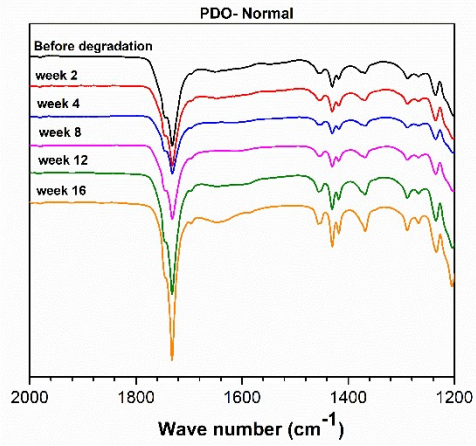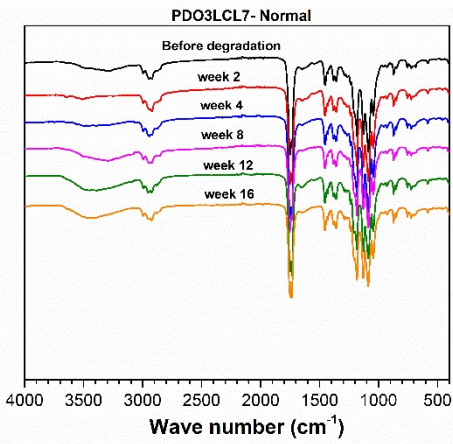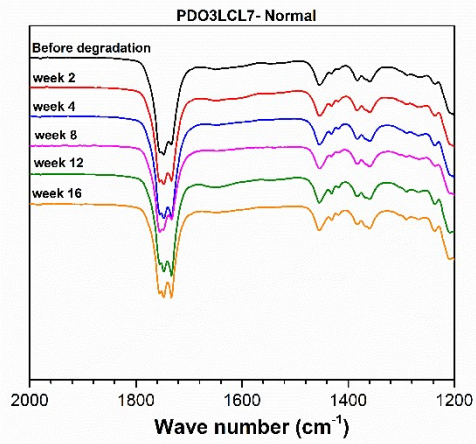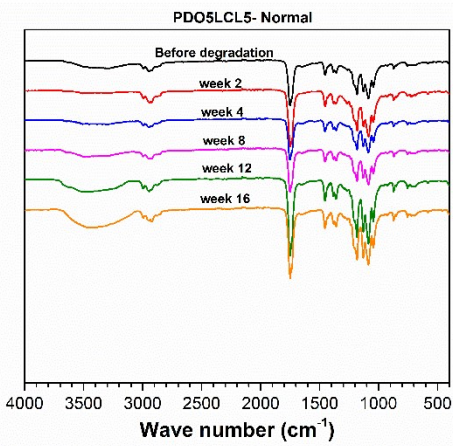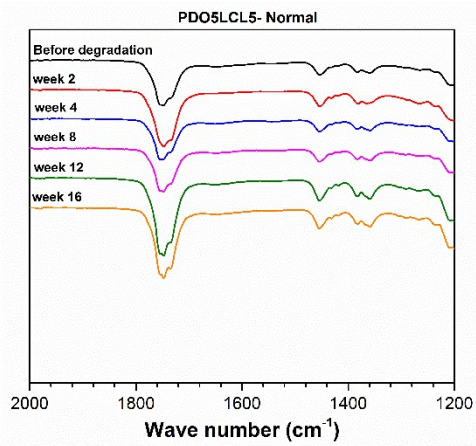

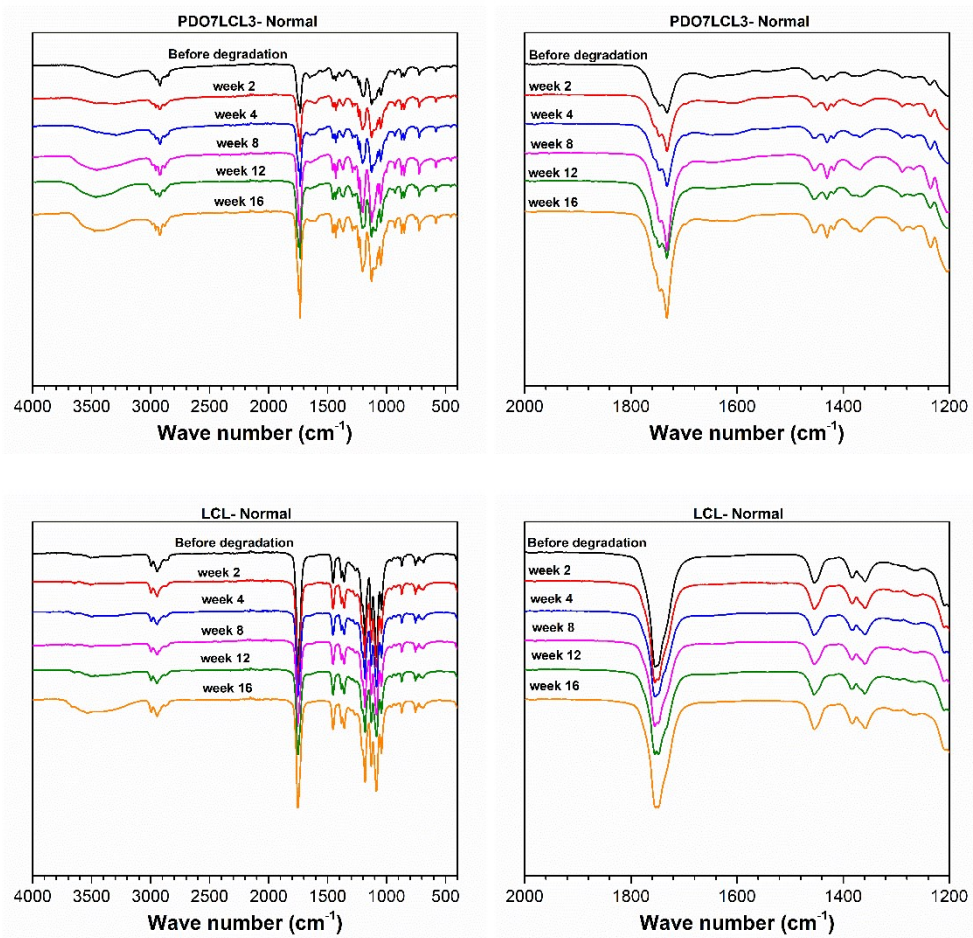

**Figure S2.** FTIR spectra of PDO/LCL blends during normal degradation. Left and right columns are assigned to 400-4000 cm<sup>-1</sup> and 1200-2000 cm<sup>-1</sup> wave numbers, respectively.

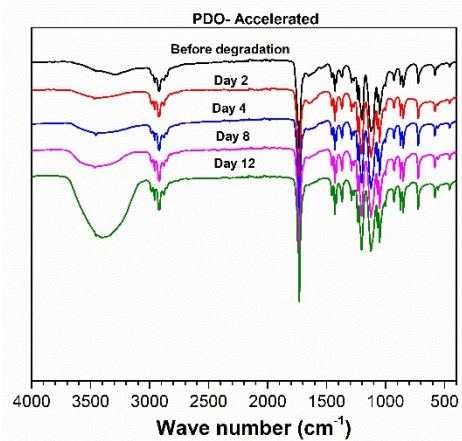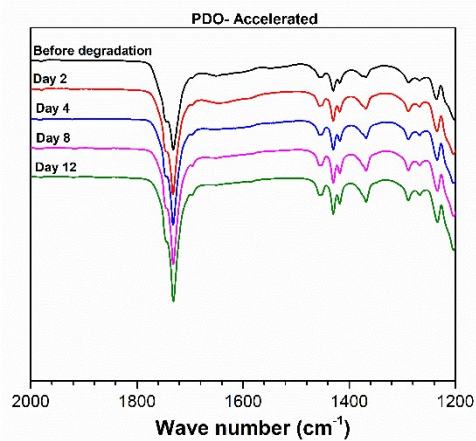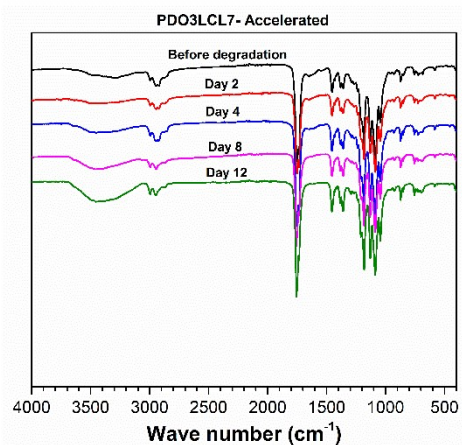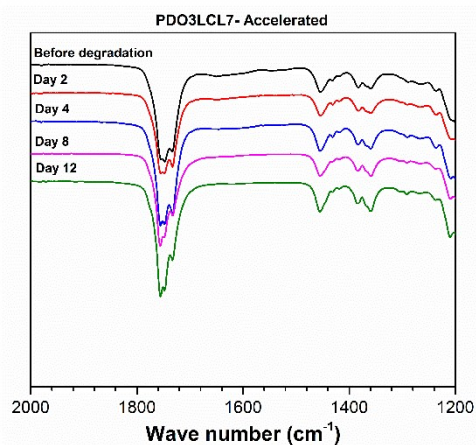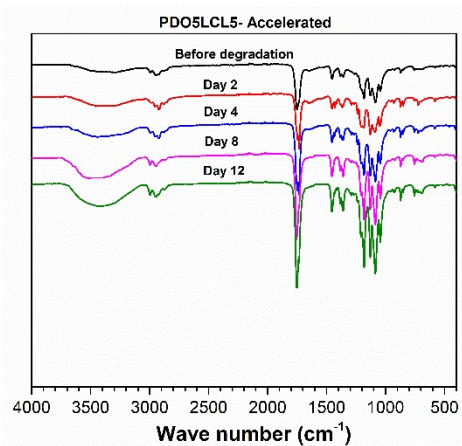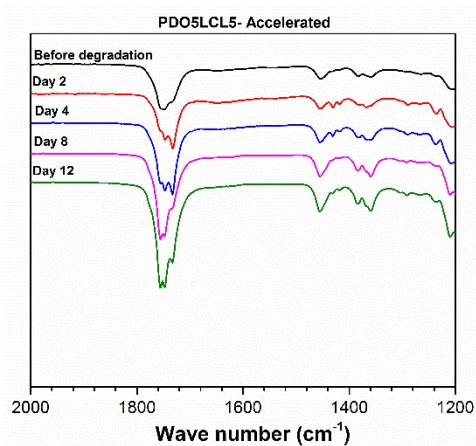

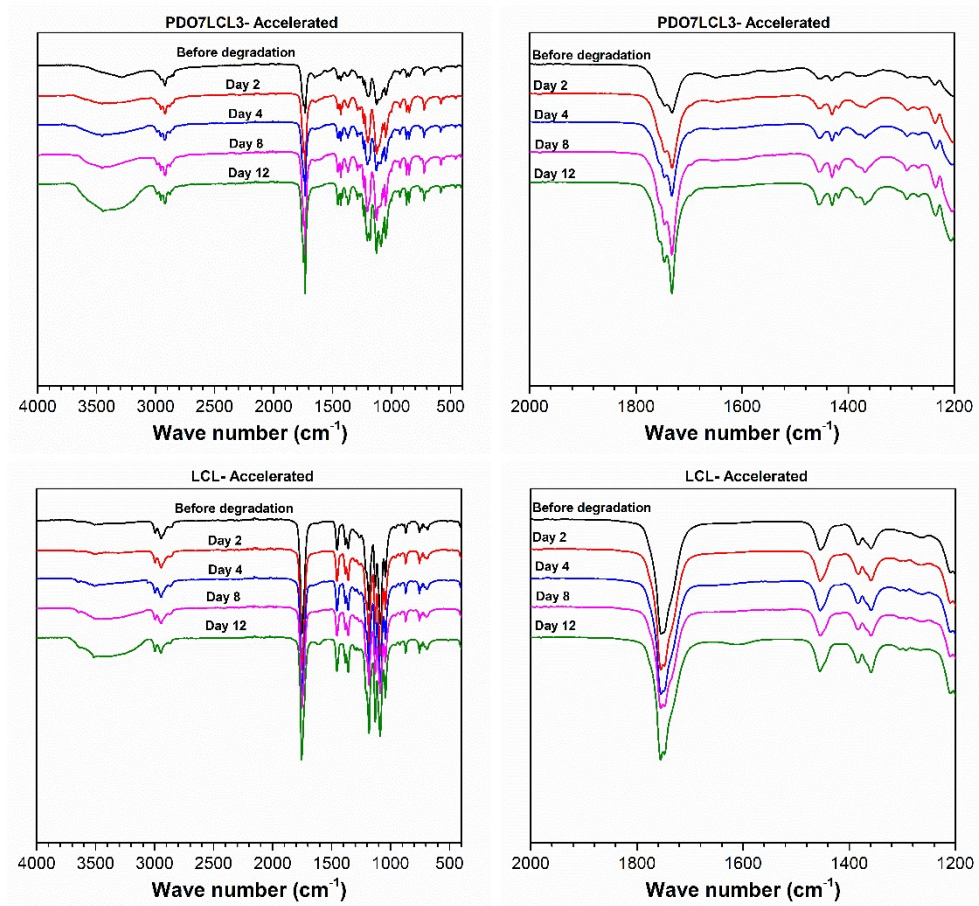

**Figure S3.** FTIR spectra of PDO/LCL blends during accelerated degradation. Left and right columns are assigned to 400-4000  $\text{cm}^{-1}$  and 1200-2000  $\text{cm}^{-1}$  wave numbers, respectively.

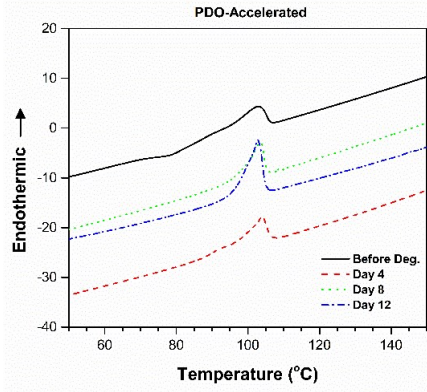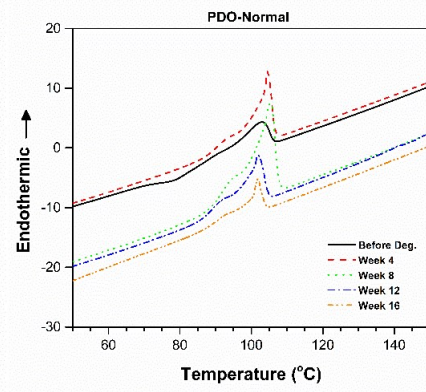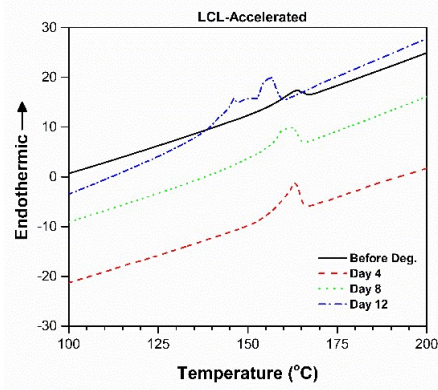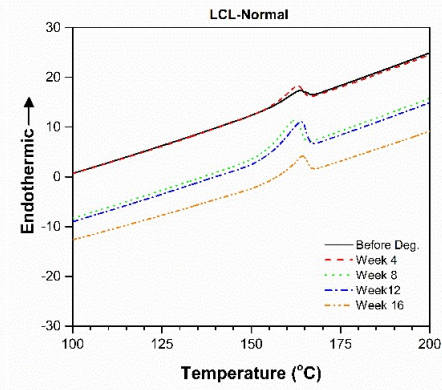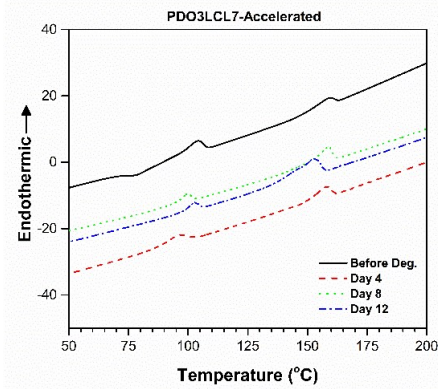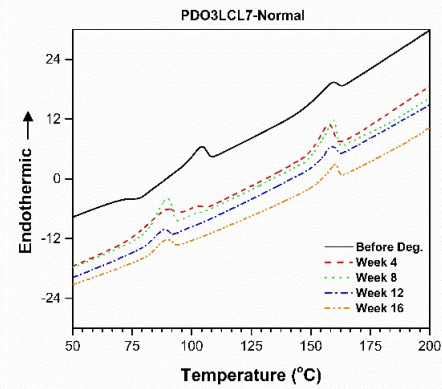

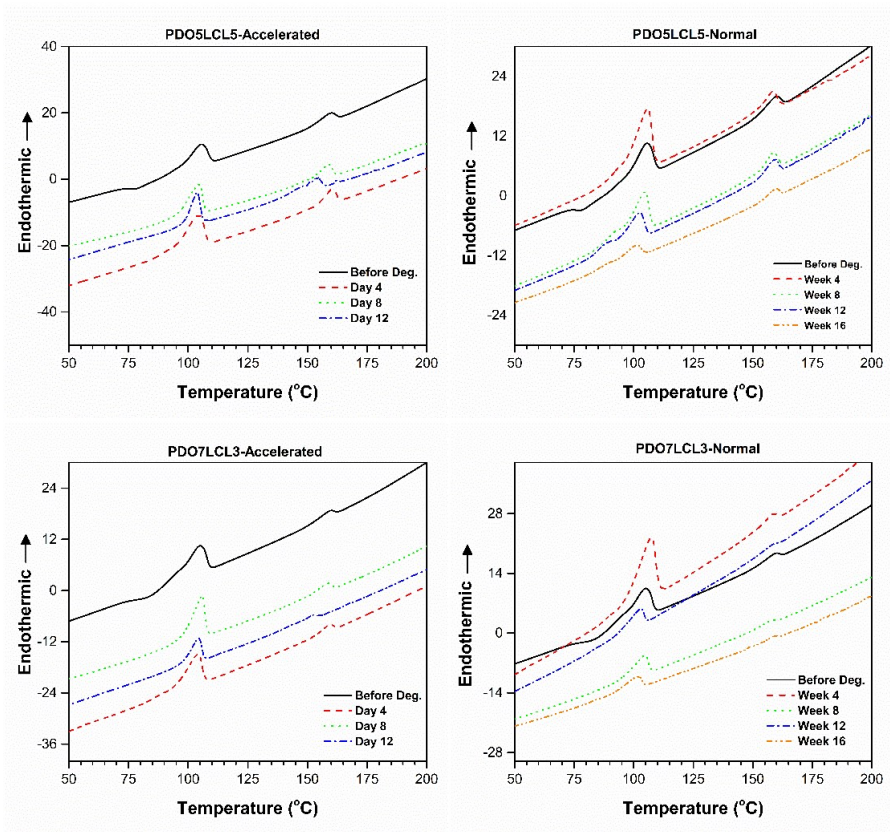

**Figure S4.** DSC curves of PDO/LCL blends during accelerated (*left column*) and normal degradations (*right column*).



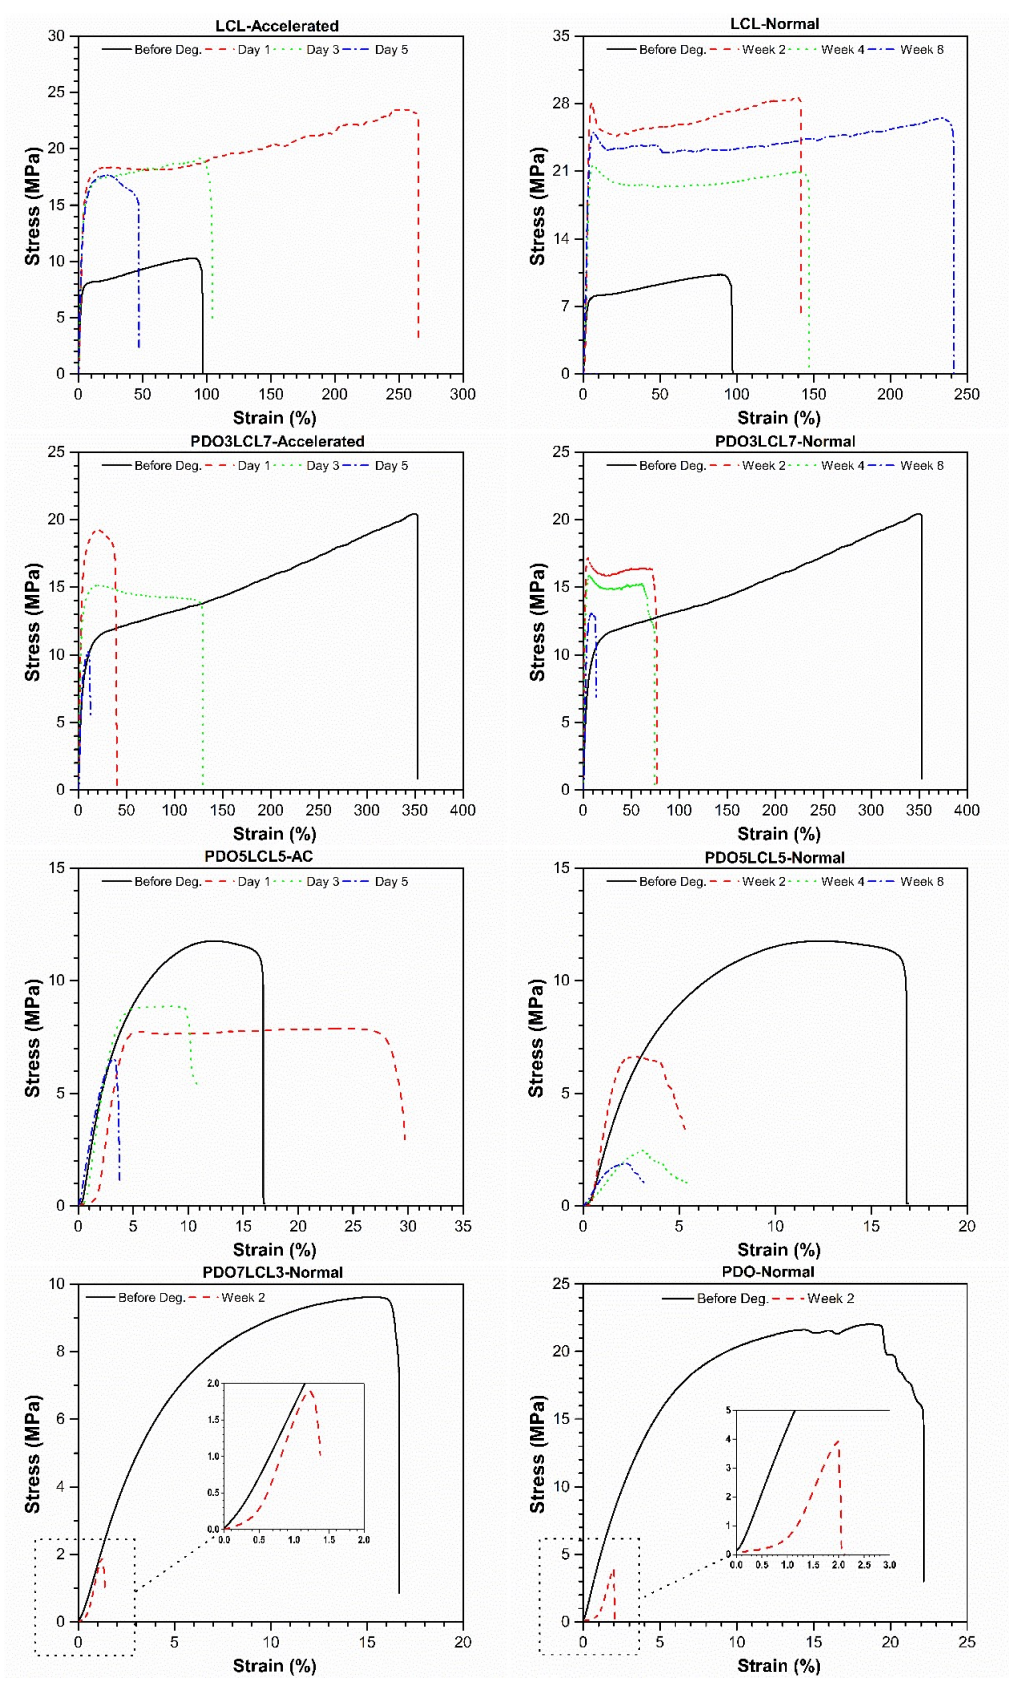

Figure S5. Stress-strain curves of PDO/LCL blends during accelerated and normal degradations.

**Table S1.** Thermal properties and crystallinity of PDO/LCL blends during accelerated degradation condition.

| Deg. Period | PDO                    |                          |                       | PDO7-LCL3              |                          |                       |                        |                          |                       | PDO5-LCL5              |                          |                       |                        |                          |                       | PDO3-LCL7              |                          |                       |                        |                          |                       | LCL                    |                          |                       |                        |                          |
|-------------|------------------------|--------------------------|-----------------------|------------------------|--------------------------|-----------------------|------------------------|--------------------------|-----------------------|------------------------|--------------------------|-----------------------|------------------------|--------------------------|-----------------------|------------------------|--------------------------|-----------------------|------------------------|--------------------------|-----------------------|------------------------|--------------------------|-----------------------|------------------------|--------------------------|
|             | PDO                    |                          |                       | PDO                    |                          |                       | LCL                    |                          |                       | PDO                    |                          |                       | LCL                    |                          |                       | PDO                    |                          |                       | LCL                    |                          |                       | LCL                    |                          |                       |                        |                          |
|             | T <sub>m</sub><br>(°C) | ΔH <sub>m</sub><br>(J/g) | X <sub>C</sub><br>(%) | T <sub>m</sub><br>(°C) | ΔH <sub>m</sub><br>(J/g) | X <sub>C</sub><br>(%) | T <sub>m</sub><br>(°C) | ΔH <sub>m</sub><br>(J/g) | X <sub>C</sub><br>(%) | T <sub>m</sub><br>(°C) | ΔH <sub>m</sub><br>(J/g) | X <sub>C</sub><br>(%) | T <sub>m</sub><br>(°C) | ΔH <sub>m</sub><br>(J/g) | X <sub>C</sub><br>(%) | T <sub>m</sub><br>(°C) | ΔH <sub>m</sub><br>(J/g) | X <sub>C</sub><br>(%) | T <sub>m</sub><br>(°C) | ΔH <sub>m</sub><br>(J/g) | X <sub>C</sub><br>(%) | T <sub>m</sub><br>(°C) | ΔH <sub>m</sub><br>(J/g) | X <sub>C</sub><br>(%) | T <sub>m</sub><br>(°C) | ΔH <sub>m</sub><br>(J/g) |
| Before Deg  | 102.6                  | 57.9                     | 47.3                  | 104.7                  | 43.0                     | 35.9                  | 159.0                  | 3.8                      | 4.2                   | 105.3                  | 29.9                     | 22.6                  | 159.3                  | 7.1                      | 7.9                   | 103.8                  | 15.8                     | 6.5                   | 158.6                  | 9.3                      | 10.3                  | 163.4                  | 10.1                     | 11.2                  |                        |                          |
| Day 4       | 103.9                  | 86.1                     | 83.7                  | 103.9                  | 52.9                     | 51.4                  | 159.1                  | 7.4                      | 8.2                   | 104.2                  | 42.0                     | 40.8                  | 160.4                  | 11.1                     | 12.3                  | 95.9                   | 18.7                     | 18.2                  | 157.8                  | 17.7                     | 19.6                  | 163.1                  | 22.2                     | 24.6                  |                        |                          |
| Day 8       | 103.1                  | 107.3                    | 104.3                 | 105.8                  | 61.2                     | 59.5                  | 158.3                  | 10.9                     | 12.1                  | 104.3                  | 43.3                     | 42.1                  | 158.6                  | 16.8                     | 18.6                  | 99.8                   | 10.1                     | 9.8                   | 158.7                  | 20.9                     | 23.2                  | 159.9                  | 27.1                     | 30.1                  |                        |                          |
| Day 12      | 102.7                  | 109.9                    | 106.8                 | 104.5                  | 56.8                     | 55.2                  | 152.1                  | 9.7                      | 10.8                  | 103.7                  | 32.4                     | 31.5                  | 153.6                  | 18.7                     | 20.7                  | 102.6                  | 6.4                      | 6.2                   | 153.0                  | 31.4                     | 34.8                  | 156.5                  | 39.8                     | 44.1                  |                        |                          |

**Table S2.** Thermal properties and crystallinity of PDO/LCL blends during normal degradation condition.

| Deg. Period | PDO                    |                          |                       | PDO7-LCL3              |                          |                       |                        |                          |                       | PDO5-LCL5              |                          |                       |                        |                          |                       | PDO3-LCL7              |                          |                       |                        |                          |                       | LCL                    |                          |                       |                        |                          |
|-------------|------------------------|--------------------------|-----------------------|------------------------|--------------------------|-----------------------|------------------------|--------------------------|-----------------------|------------------------|--------------------------|-----------------------|------------------------|--------------------------|-----------------------|------------------------|--------------------------|-----------------------|------------------------|--------------------------|-----------------------|------------------------|--------------------------|-----------------------|------------------------|--------------------------|
|             | PDO                    |                          |                       | PDO                    |                          |                       | LCL                    |                          |                       | PDO                    |                          |                       | LCL                    |                          |                       | PDO                    |                          |                       | LCL                    |                          |                       | LCL                    |                          |                       |                        |                          |
|             | T <sub>m</sub><br>(°C) | ΔH <sub>m</sub><br>(J/g) | X <sub>C</sub><br>(%) | T <sub>m</sub><br>(°C) | ΔH <sub>m</sub><br>(J/g) | X <sub>C</sub><br>(%) | T <sub>m</sub><br>(°C) | ΔH <sub>m</sub><br>(J/g) | X <sub>C</sub><br>(%) | T <sub>m</sub><br>(°C) | ΔH <sub>m</sub><br>(J/g) | X <sub>C</sub><br>(%) | T <sub>m</sub><br>(°C) | ΔH <sub>m</sub><br>(J/g) | X <sub>C</sub><br>(%) | T <sub>m</sub><br>(°C) | ΔH <sub>m</sub><br>(J/g) | X <sub>C</sub><br>(%) | T <sub>m</sub><br>(°C) | ΔH <sub>m</sub><br>(J/g) | X <sub>C</sub><br>(%) | T <sub>m</sub><br>(°C) | ΔH <sub>m</sub><br>(J/g) | X <sub>C</sub><br>(%) | T <sub>m</sub><br>(°C) | ΔH <sub>m</sub><br>(J/g) |
| Before Deg  | 102.6                  | 57.9                     | 47.3                  | 104.7                  | 43.0                     | 35.9                  | 159.0                  | 3.8                      | 4.2                   | 105.3                  | 29.9                     | 22.6                  | 159.3                  | 7.1                      | 7.9                   | 103.8                  | 15.8                     | 6.5                   | 158.6                  | 9.3                      | 10.3                  | 163.4                  | 10.1                     | 11.2                  |                        |                          |
| Week 4      | 104.5                  | 74.9                     | 72.8                  | 107.1                  | 51.3                     | 49.9                  | 158.2                  | 4.1                      | 4.5                   | 105.6                  | 37.5                     | 36.4                  | 158.3                  | 7.9                      | 8.8                   | 89.7                   | 18.6                     | 18.1                  | 157.5                  | 13.6                     | 15.1                  | 162.7                  | 15.0                     | 16.6                  |                        |                          |
| Week 8      | 105.3                  | 86.4                     | 84.0                  | 104.6                  | 48.8                     | 47.4                  | 157.2                  | 5.3                      | 5.9                   | 104.3                  | 37.6                     | 36.5                  | 158.6                  | 8.5                      | 9.4                   | 89.5                   | 19.7                     | 19.1                  | 159.2                  | 19.1                     | 21.2                  | 161.9                  | 18.8                     | 20.9                  |                        |                          |
| Week 12     | 101.8                  | 88.6                     | 86.1                  | 102.6                  | 49.2                     | 47.8                  | 157.9                  | 8.4                      | 9.3                   | 102.2                  | 37.1                     | 36.1                  | 159.0                  | 12.1                     | 13.4                  | 88.1                   | 16.1                     | 15.6                  | 157.9                  | 19.0                     | 21.1                  | 163.8                  | 21.8                     | 24.2                  |                        |                          |
| Week 16     | 101.8                  | 88.8                     | 86.3                  | 101.2                  | 51.5                     | 50.0                  | 158.9                  | 9.7                      | 10.8                  | 100.9                  | 32.1                     | 31.2                  | 159.4                  | 13.3                     | 14.8                  | 88.7                   | 16.5                     | 16.0                  | 160.0                  | 20.2                     | 22.4                  | 164.1                  | 24.7                     | 27.4                  |                        |                          |

**Table S3.** Tensile properties of PDO/LCL blends (n = 3 in each group) during normal degradation condition.

| Time        | LCL           |                      |                         |                         | PDO           |                      |                         |                         | PDO3LCL7      |                      |                         |                         | PDO5LCL5      |                      |                         |                         | PDO7LCL3      |                      |                         |                         |
|-------------|---------------|----------------------|-------------------------|-------------------------|---------------|----------------------|-------------------------|-------------------------|---------------|----------------------|-------------------------|-------------------------|---------------|----------------------|-------------------------|-------------------------|---------------|----------------------|-------------------------|-------------------------|
|             | Modulus (MPa) | Yield Strength (MPa) | Ultimate strength (MPa) | Elongation at break (%) | Modulus (MPa) | Yield Strength (MPa) | Ultimate strength (MPa) | Elongation at break (%) | Modulus (MPa) | Yield Strength (MPa) | Ultimate strength (MPa) | Elongation at break (%) | Modulus (MPa) | Yield Strength (Mpa) | Ultimate strength (Mpa) | Elongation at break (%) | Modulus (MPa) | Yield Strength (Mpa) | Ultimate strength (Mpa) | Elongation at break (%) |
| Before Deg. | 337 ±39       | 6.9±1.0              | 11.7±2.9                | 107.9±69.7              | 376 ±13       | 15.3±3.1             | 20.5±1.2                | 22.8±9.3                | 186 ±11       | 9.0±0.3              | 18.9±1.1                | 320.3±29.9              | 279 ±24       | 7.5±0.4              | 11.9±1.3                | 16.8±1.9                | 158 ±14       | 6.6±0.2              | 9.7±0.5                 | 16.3±1.0                |
| Week 2      | 968 ±80       | 24.2±1.8             | 28.2±2.8                | 124.0±20.1              | 322 ±100      | 2.2±1.1              | 2.8±1.1                 | 1.6±0.8                 | 795 ±104      | 18.2±2.9             | 20.8±3.2                | 61.5±5.7                | 449 ±65       | 6.0±0.2              | 6.5±0.1                 | 3.8±0.9                 | 219 ±67       | 1.9±0.2              | 2.0±0.1                 | 2.1±1.1                 |
| Week 4      | 761 ±124      | 22.6±2.3             | 26.0±3.8                | 188.1±37.3              | -             | -                    | -                       | -                       | 572 ±77       | 13.9±0.7             | 16.1±0.2                | 84.4±29.3               | 143 ±40       | 2.1±0.2              | 2.3±0.3                 | 3.1±0.5                 | -             | -                    | -                       | -                       |
| Week 8      | 868 ±223      | 23.8±2.0             | 29.6±2.8                | 268.7±33.1              | -             | -                    | -                       | -                       | 413 ±13       | 10.1±0.4             | 12.7±0.5                | 14.9±2.8                | 137 ±32       | 2.1±0.7              | 2.4±0.8                 | 3.7±1.1                 | -             | -                    | -                       | -                       |

**Table S4.** Tensile properties of PDO/LCL blends (n = 3 in each group) during accelerated degradation condition.

| Time        | LCL           |                      |                         |                         | PDO3LCL7      |                      |                         |                         | PDO5LCL5      |                      |                         |                         |
|-------------|---------------|----------------------|-------------------------|-------------------------|---------------|----------------------|-------------------------|-------------------------|---------------|----------------------|-------------------------|-------------------------|
|             | Modulus (MPa) | Yield Strength (MPa) | Ultimate strength (MPa) | Elongation at break (%) | Modulus (MPa) | Yield Strength (MPa) | Ultimate strength (MPa) | Elongation at break (%) | Modulus (MPa) | Yield Strength (MPa) | Ultimate strength (MPa) | Elongation at break (%) |
| Before Deg. | 337±39        | 6.9±1.0              | 11.7±2.9                | 107.9±69.7              | 186±11        | 9.0±0.3              | 18.9±1.1                | 320.3±29.9              | 279±24        | 7.5±0.4              | 11.9±1.3                | 16.8±1.9                |
| Day 1       | 514±64        | 18.6±1.6             | 23.2±1.0                | 214.4±82.6              | 503±52        | 12.4±1.2             | 18.0±1.1                | 48.6±24.4               | 367±37        | 7.9±0.7              | 9.0±1.3                 | 24.9±12.7               |
| Day 3       | 487±23        | 15.9±1.5             | 20.2±1.9                | 193.0±93.4              | 424±21        | 11.7±0.8             | 15.2±1.1                | 142.2±28.2              | 373±27        | 7.7±0.9              | 9.3±1.1                 | 10.8±2.4                |
| Day 5       | 420±54        | 11.2±0.6             | 20.1±2.2                | 68.0±67.5               | 269±31        | 6.9±0.8              | 10.1±1.4                | 15.8±7.8                | 227±53        | 5.7±0.1              | 6.3±0.5                 | 3.6±0.3                 |

## References

- 1 X. T. Dong, W. T. Shi, H. C. Dang, W. Y. Bao, X. L. Wang and Y. Z. Wang, *Ind. Eng. Chem. Res.*, 2012, **51**, 14037–14046.
- 2 B. S. Heidari, V.-S. Cheraghchi, S. Motahari, G. H. Motlagh and S. M. Davachi, *J. Sol-Gel Sci. Technol.*, 2018, **88**, 236–248.
- 3 S. M. Davachi, B. Kaffashi, B. Torabinejad and A. Zamanian, *Polymer (Guildf.)*, 2016, **83**, 101–110.
- 4 D. K. Wang, S. Varanasi, P. M. Fredericks, D. J. T. Hill, A. L. Symons, A. K. Whittaker and F. Rasoul, *J. Polym. Sci. Part A Polym. Chem.*, 2013, **51**, 5163–5176.
